# Supplementary material for: Assessing and enhancing Noah-MP land surface modeling over tropical environments
Source: Copernicus journal article supplement (doi:10.5194/egusphere-2025-3898), 2025-08-19
Supplement: Supplementary file 1 [file egusphere-2025-3898-supplement.pdf]

**Assessing and enhancing Noah-MP land surface modeling over tropical environments**

Yanyan Cheng<sup>1\*</sup>, Kalli Furtado<sup>1</sup>, Cenlin He<sup>2</sup>, Fei Chen<sup>3</sup>, Alan Ziegler<sup>4</sup>, Song Chen<sup>1</sup>, Matteo Detto<sup>5,6</sup>, Yuna Mao<sup>7</sup>, Baoxiang Pan<sup>8</sup>, Yoshiko Kosugi<sup>9</sup>, Marryanna Lion<sup>10</sup>, Shoji Noguchi<sup>11</sup>, Satoru Takanashi<sup>12</sup>, Lulie Melling<sup>13</sup>, Baoqing Zhang<sup>14</sup>

*1 Centre for Climate Research Singapore, Singapore, Singapore*

*2 NSF National Center for Atmospheric Research, Boulder, Colorado, USA*

*3 Division of Environment and Sustainability, The Hong Kong University of Science and Technology, Hong Kong, Hong Kong, China*

*4 Faculty of Fisheries Technology and Aquatic Resources, Maejo University, Chiang Mai, Thailand*

*5 Department of Ecology and Evolutionary Biology, Princeton University, Princeton, New Jersey, USA*

*6 Smithsonian Tropical Research Institute, Panama City, Panama*

*7 State Key Laboratory of Earth Surface Processes and Resource Ecology, Faculty of Geographical Science, Beijing Normal University, Beijing, China*

*8 Institute of Atmospheric Physics, Chinese Academy of Sciences, Beijing, China*

*9 Laboratory of Forest Hydrology, Division of Forest and Biomaterials Science, Graduate School of Agriculture, Kyoto University, Kyoto, Japan*

*10 Forest Research Institute Malaysia, Kepong, Selangor, Malaysia*

*11 Tohoku Research Center, Forestry and Forest Products Research Institute, Iwate, Japan*

*12 Kansai Research Center, Forestry and Forest Products Research Institute, Kyoto, Japan*

*13 UN Sustainable Development Solutions Network, Asia Headquarters, Sunway University, Bandar Sunway, Selangor, Malaysia*

*14 Key Laboratory of West China's Environmental Systems (Ministry of Education), College of Earth and Environmental Sciences, Lanzhou University, Lanzhou, Gansu, China*

**Supplementary Figures**

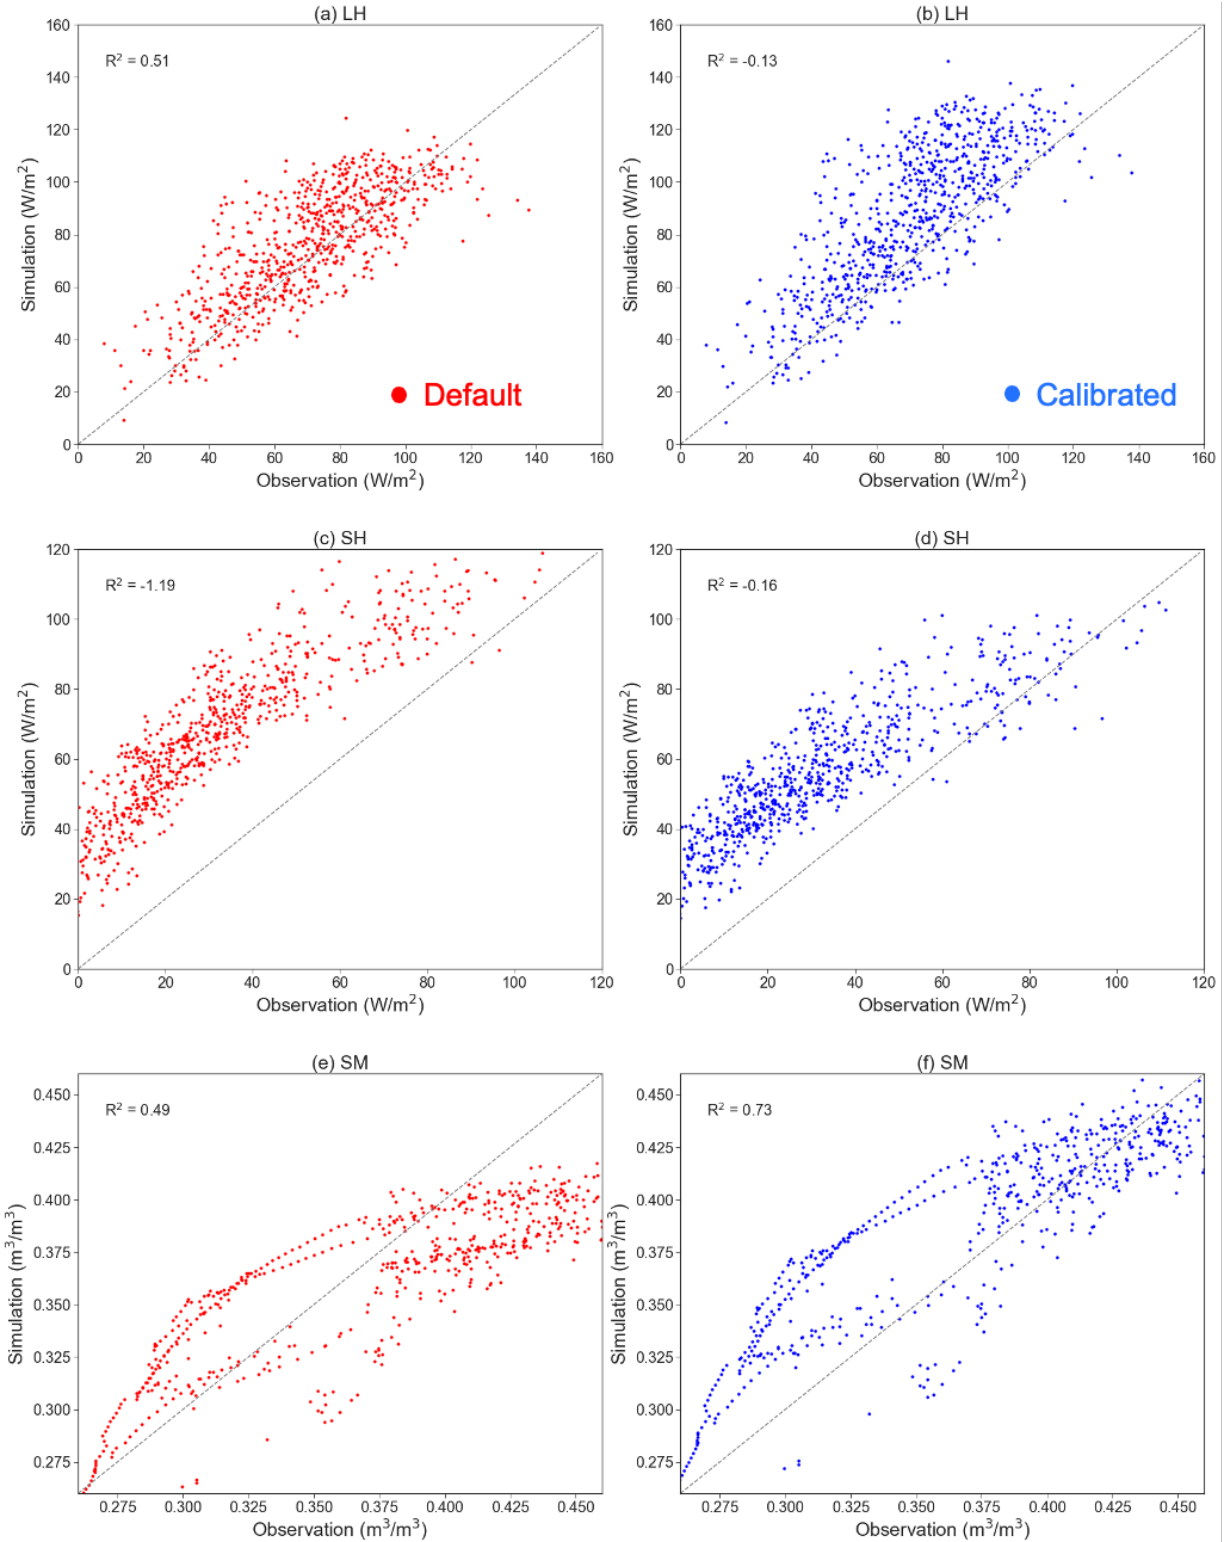

**Figure S1:** Scatterplot for observed and simulated for (a-b) latent heat, (c-d) sensible heat, and (e-f) soil moisture at the Panama BCI tropical forest site, using default parameters (left column, red dots) and calibrated parameters (right column, blue dots). The negative  $R^2$  values indicate the model is arbitrarily poor.

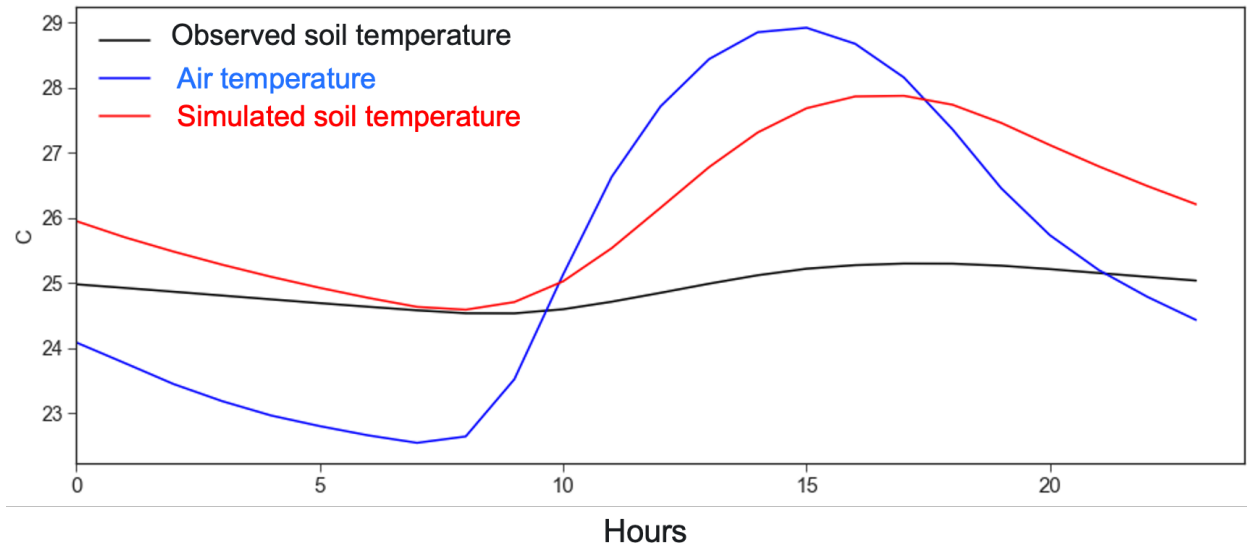

**Figure S2:** Observed and Noah-MP simulated soil temperature and air temperature at the Malaysia PSO site.

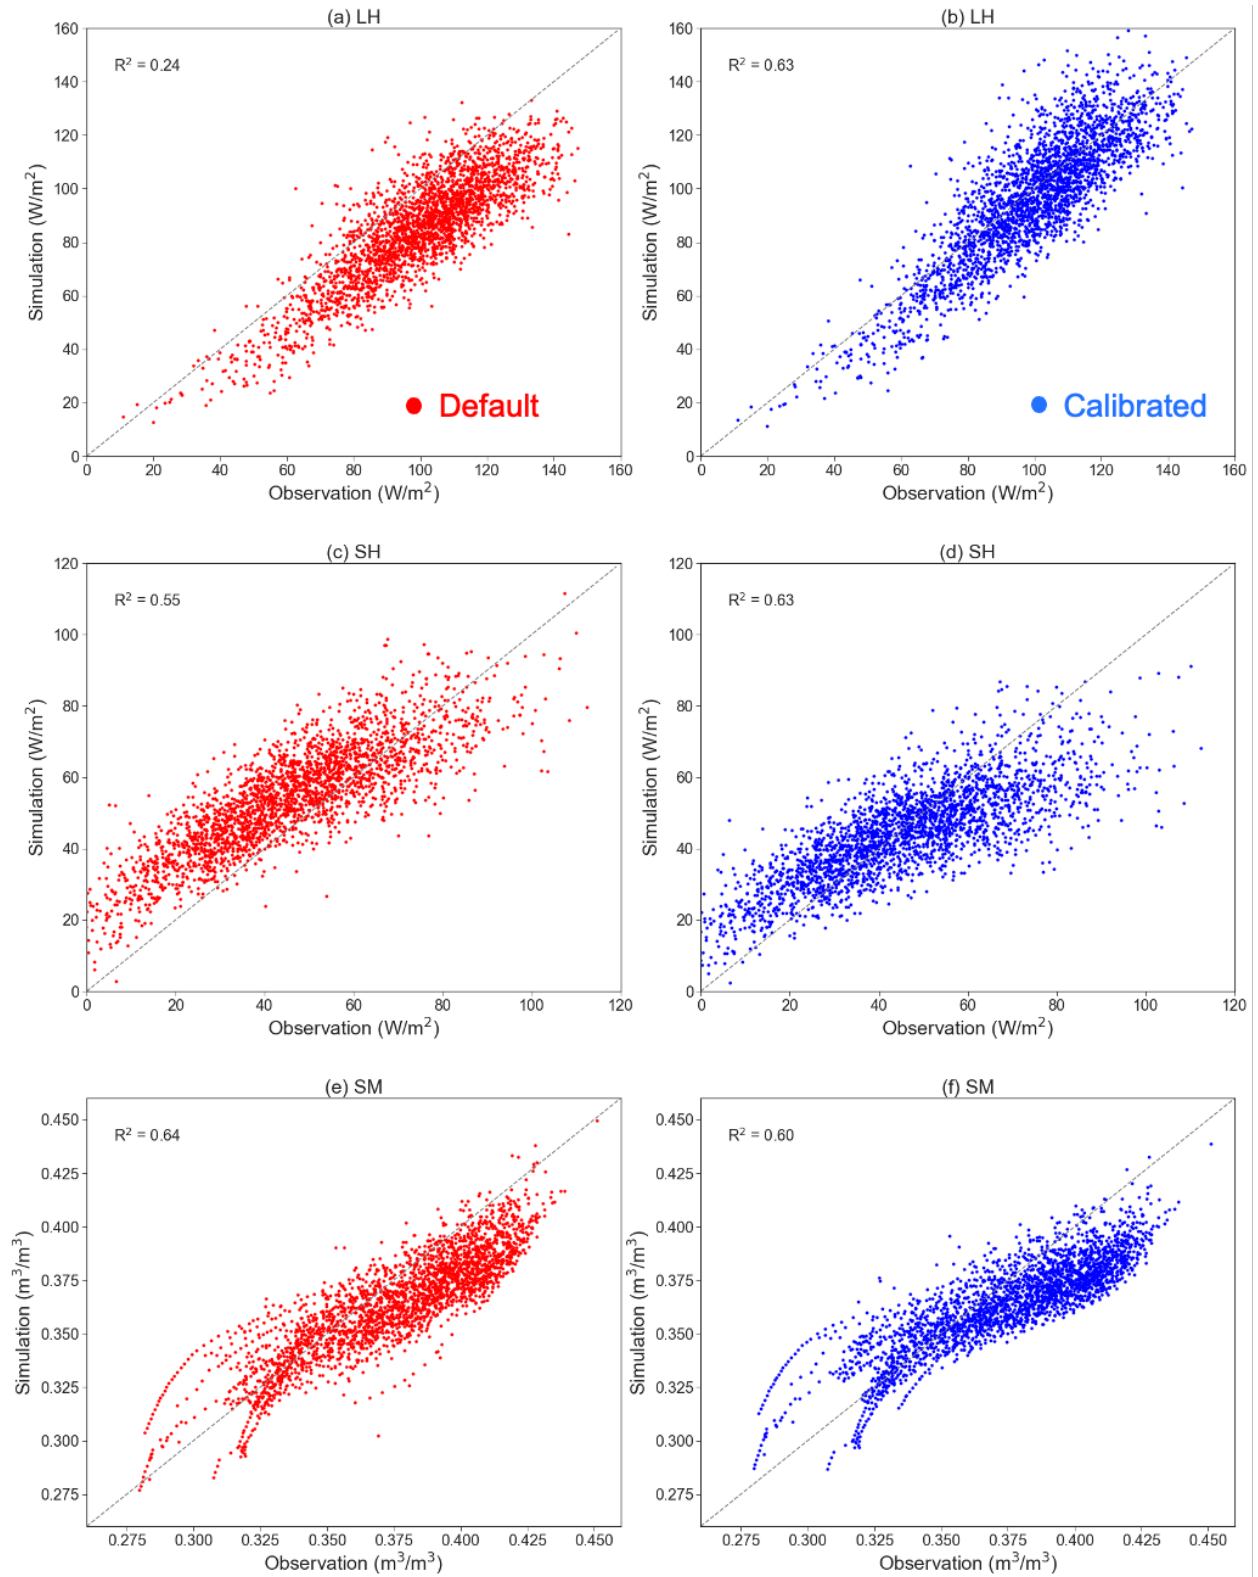

**Figure S3:** Scatterplot for observed and simulated for (a-b) latent heat, (c-d) sensible heat, and (e-f) soil moisture at the Malaysia PSO tropical forest site, using default parameters (left column, red dots) and calibrated parameters (right column, blue dots).

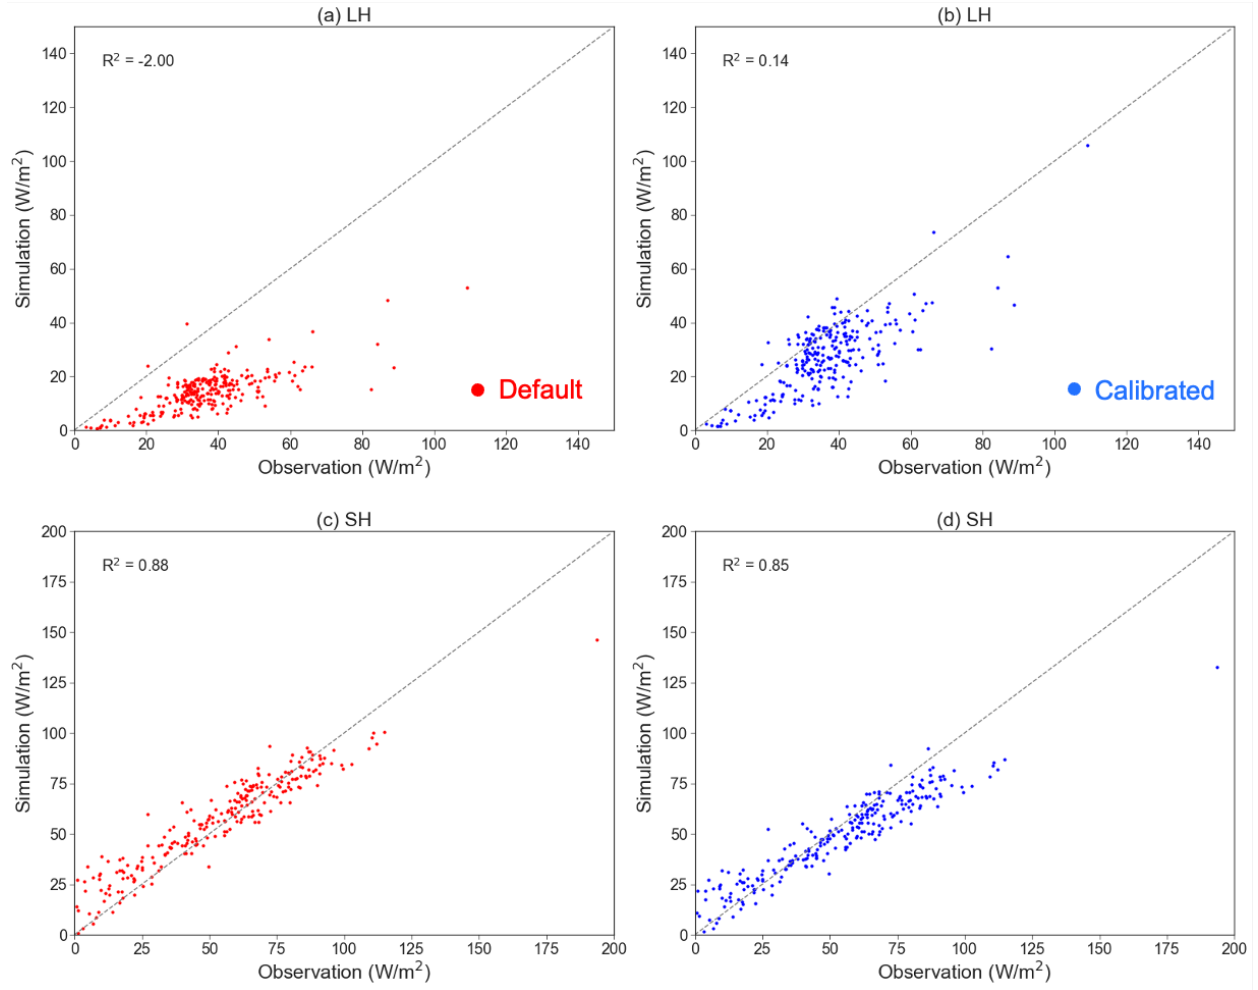

**Figure S4:** Scatterplot for observed and simulated for (a-b) latent heat and (c-d) sensible heat at the Singapore tropical urban site, using default parameters (left column, red dots) and calibrated parameters (right column, blue dots). The negative  $R^2$  values indicate the model is arbitrarily poor.
